# Supplementary material for: Preparation and thermoresponsive properties of helical polypeptides bearing pyridinium salts
Source: Royal Society of Chemistry journal article supplement (doi:10.1039/c5ra04541j), 2015-01-01
Supplement: c5ra04541j1.pdf [file c5ra04541j1.pdf]

Supporting Information

**Preparation and Thermoresponsive Properties of Helical Polypeptides Bearing  
Pyridinium Salts**

Yan Wu, Xi Wang, Ying Ling\* and Haoyu Tang\*

*Key Laboratory of Polymeric Materials and Application Technology of Hunan  
Province, Key Laboratory of Advanced Functional Polymer Materials of Colleges  
and Universities of Hunan Province, College of Chemistry, Xiangtan University,  
Xiangtan, Hunan, 411105, China*

*Correspondence to:* Haoyu Tang (Email: htang@xtu.edu.cn) and Ying Ling (E-mail:  
yingling0202@gmail.com)

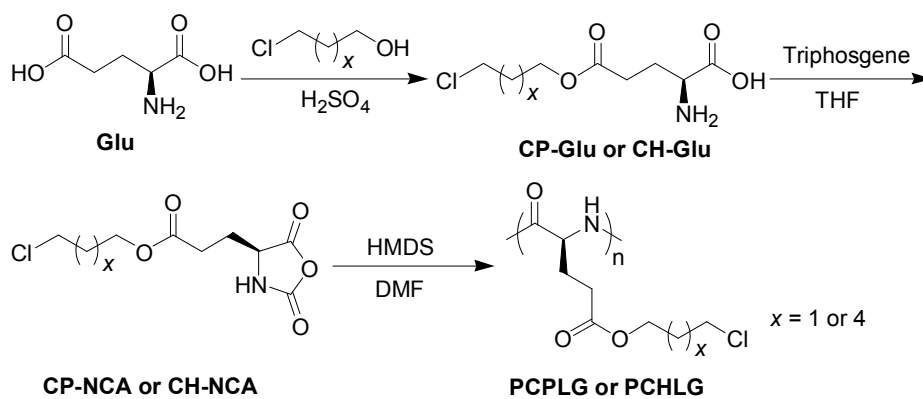

**Scheme S1.** The synthetic route of poly( $\gamma$ -3-propyl-L-glutamate) and poly( $\gamma$ -6-hexyl-L-glutamate).

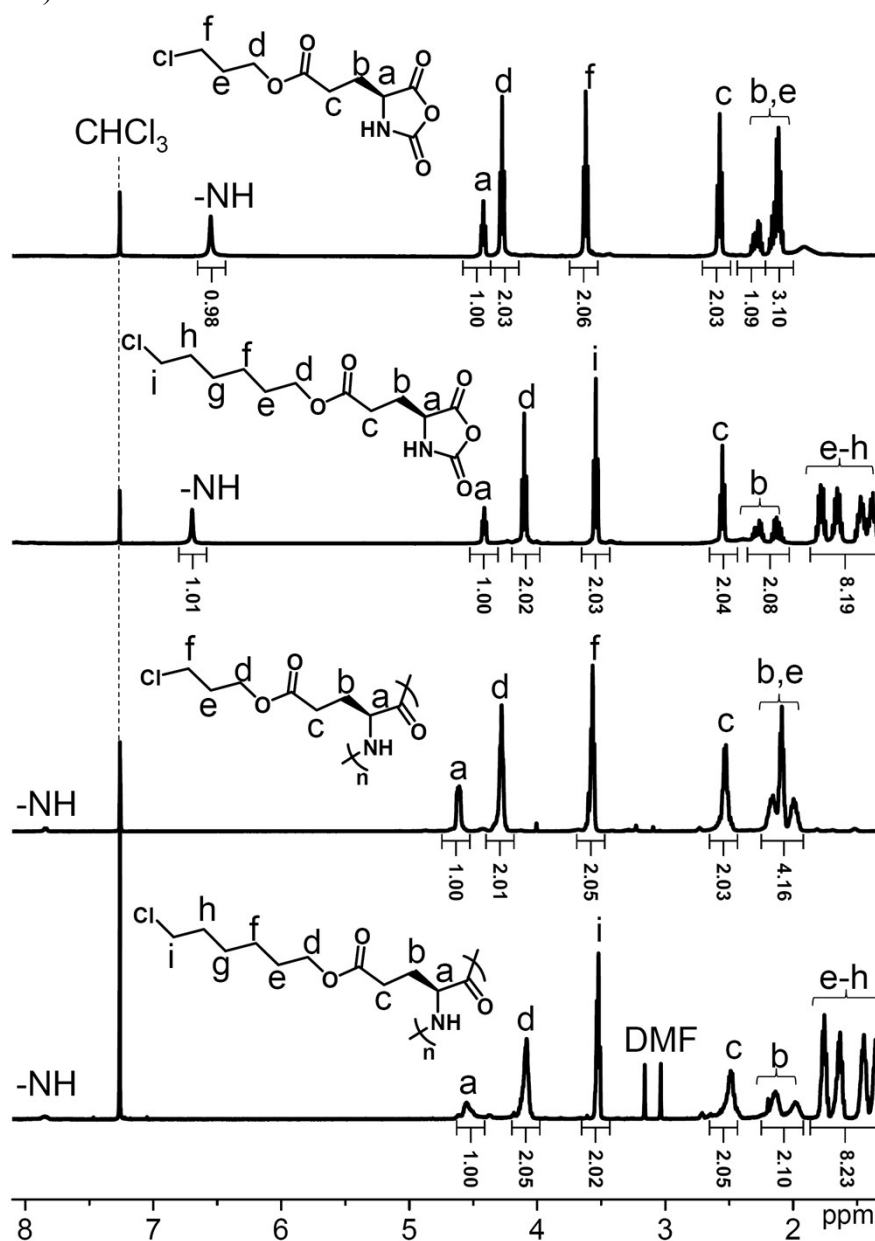

**Figure S1.** <sup>1</sup>H NMR spectra of CP-NCA and CH-NCA in CDCl<sub>3</sub>, PCPLG and PCHLG in CDCl<sub>3</sub>/TFA-*d* (V/V = 80/20).

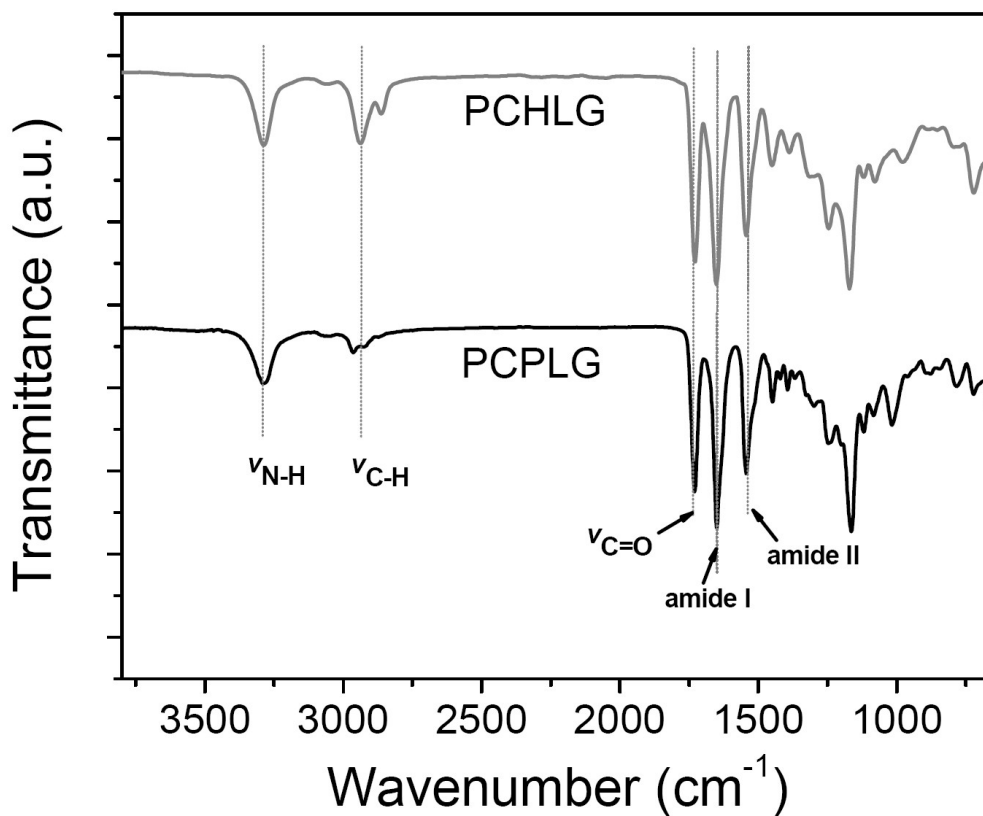

**Figure S2.** FTIR spectra of PCPLG and PCHLG.

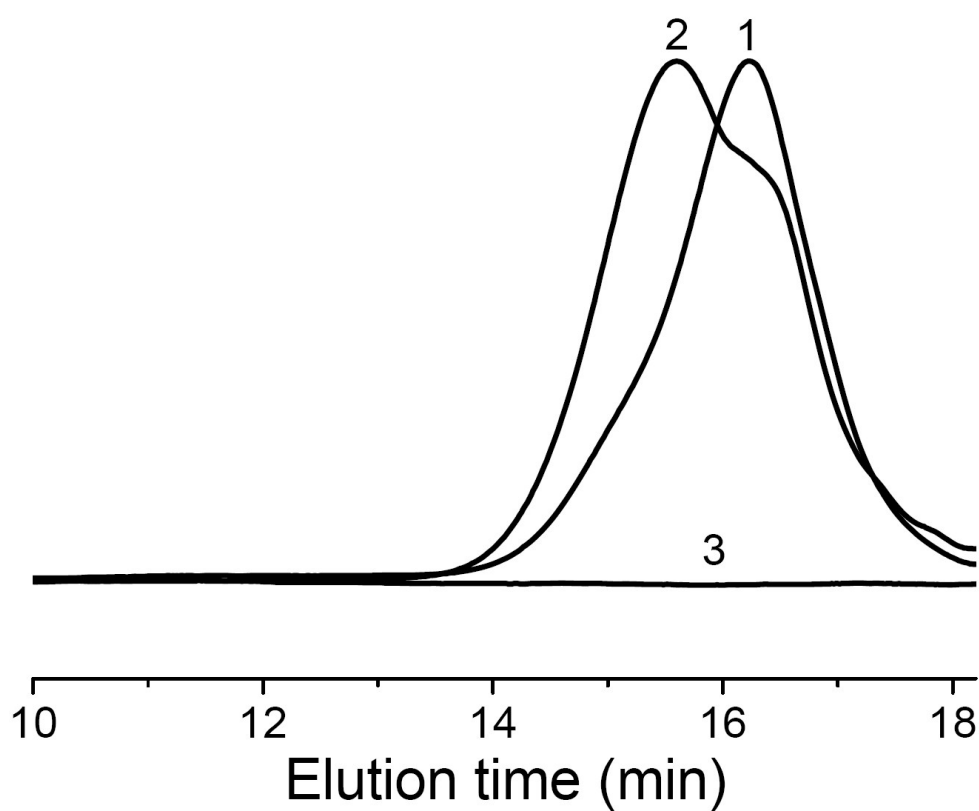

**Figure S3.** GPC chromatogram of PCPLG (curve 1:  $M_n = 5570$ , PDI = 1.32, DP = 27), PCHLG (curve 2:  $M_n = 6430$ , PDI = 1.57, DP = 26), and **P15** (curve 3).
